# Supplementary material for: Upregulation of E2F8 promotes cell proliferation and tumorigenicity in breast cancer by modulating G1/S phase transition
Source: PubMed Central journal article supplement (PMC5029661; doi:10.18632/oncotarget.8121), 2016-03-16
Supplement: oncotarget-07-23757-s001.pdf [file oncotarget-07-23757-s001.pdf]

## Upregulation of E2F8 promotes cell proliferation and tumorigenicity in breast cancer by modulating G1/S phase transition

### Supplementary Materials

#### SUPPLEMENTARY MATERIALS AND METHODS

##### RNA extraction, reverse transcription (RT) and real-time PCR

Total RNA was extracted from cultured cells using the Trizol reagent (Invitrogen, Carlsbad, CA, USA) according to the manufacturer's instructions. 2 µg extracted RNA from each sample was used for cDNA synthesis with M-MLV Reverse Transcriptase (Promega, Madison, US). cDNAs were amplified and quantified by SYBR-Green in ABI Prism 7500 Sequence Detection System (Applied Biosystems, Texas, US). Expression data were normalized to the housekeeping gene GAPDH and calculated as  $2^{-[(Ct \text{ of } gene) - (Ct \text{ of } GAPDH)]}$ , where Ct represents the threshold cycle for each transcript.

##### Flow cytometry

Cells were harvested and fixed in 75% ethanol, and stored at 4°C overnight for later cell cycle analysis using flow cytometry. The fixed cells were centrifuged at 1,000 rpm for 5 minutes and washed with cold 1 × PBS twice. RNase A (20 µg/ml final concentration) and propidium iodide staining solution (50 µg/mL final concentration) were added to the cells and incubated for 30 minutes at 37°C in the dark.  $2 \times 10^5$  cells were analyzed using

a FACSC alibur instrument (BD Biosciences) equipped with CellQuest 3.3 software. Modfit LT 3.1 trial cell cycle analysis software was used to determine the percentage of cells in the different phases of the cell cycle.

##### Bromodeoxyuridine incorporation assay

To evaluate the cell population in S phase of the cell cycle, cells were incubated with bromodeoxyuridine (BrdU; Sigma-Aldrich) for 1 h and incubated with anti-BrdU antibody (Upstate, Billerica, MA, USA). The samples images were acquired under a laser scanning microscope (Axioskop 2 plus; Carl Zeiss Co Ltd, Oberkochen, Germany).

##### Transwell assay

Cells ( $2 \times 10^4$ ) were seeded on the transwell inserts (pre-coated with Matrigel for invasion assay; didn't pre-coat with Matrigel for migration assay) with 8 µm micropore filters (Corning Costar) in 500 µl medium. Medium containing 10% FBS was added to the lower chamber as a chemoattractant. After 24 h, cells on the upper side of the filter were removed with a cotton swab. Cells that had penetrated to the lower membrane surface were fixed in 1% paraformaldehyde, stained with hematoxylin and counted under an optical microscope ( $\times 100$  magnification). Cell counts are expressed as the mean number of cells from 10 random fields per well.

## Primers and oligonucleotides:

| <b>Real-time PCR primers:</b>                             |                                                      |                                                    |
|-----------------------------------------------------------|------------------------------------------------------|----------------------------------------------------|
| Gene                                                      | Forward primer (5'–3')                               | Reverse primer (5'–3')                             |
| E2F8                                                      | GAAATCCCAACCAAGTCGAA                                 | CTTCGTCAAGGCAGATGTCA                               |
| CCNE1                                                     | CGGTATATGGCGACACAAGA                                 | ACATACGCAAACCTGGTGCAA                              |
| CCNE2                                                     | AGGAAAACCTACCCAGGATGTCA                              | ATCAGGCAAAGGTGAAGGATTA                             |
| GAPDH                                                     | GCACCGTCAAGGCTGAGAAC                                 | TGGTGAAGACGCCAGTGGA                                |
| <b>The primers used for promoter luciferase reporter:</b> |                                                      |                                                    |
| Gene                                                      | Forward primer (5'–3')                               | Reverse primer (5'–3')                             |
| CCNE1 promoter                                            | AGGTACCGAGCTCTTACGCGTGCCATG<br>ATACTTTGAAGGACTTAGCCC | TGCAGTCGGGGCGGCAGATCTCAGGAGT<br>CCCTGTCCGCAG       |
| CCNE2 promoter                                            | AGGTACCGAGCTCTTACGCGTGCCCC<br>AGTCTCCTTTCCCTCCTTC    | TGCAGTCGGGGCGGCAGATCTGCATT<br>CTGTTACATAATAGTCAAGG |
| <b>The primers used for ChIP:</b>                         |                                                      |                                                    |
| Gene                                                      | Forward primer (5'–3')                               | Reverse primer (5'–3')                             |
| CCNE1 p1                                                  | ATGATACTTTGAAGGACTTAGCCC                             | GCCCTTCTTAAGCTAAAGTCTCAG                           |
| CCNE1 p2                                                  | GGACAGGACTGAGACTTTAGCTTAA                            | CTTGTCTCTCTCCCCACCTTG                              |
| CCNE1 p3                                                  | CAGTGAGCAAGATGGGCAAG                                 | ACAGGACCTGACCCTGATCC                               |
| CCNE1 p4                                                  | GGAGAGGAGGCTGAGGTC                                   | TGGCTCTCTGAAGACCTTTCTG                             |
| CCNE1 p5                                                  | GGAATCCAGAGTCAGAAAGGT                                | GGACATCCCCAAGGTCACC                                |
| CCNE1 p6                                                  | CGGTGACCTTGGGGATGT                                   | GGACGCGGGAGAAGTCTG                                 |
| CCNE1 p7                                                  | GCCAGACTTCTCCCGCGT                                   | GGCTCAGAGCGGGACATTTA                               |
| CCNE1 p8                                                  | TAAATGTCCCGCTCTGAGCC                                 | CAGGAGTCCCTGTCCGCAG                                |
| CCNE2 p1                                                  | CCAGTCTCCTTTCCCTCCTTC                                | GAGAGCCGCCCTCATT                                   |
| CCNE2 p2                                                  | CCAAATGAGGGTGGGATAGAG                                | GTCTGGCGGTGAGGAGTTG                                |
| CCNE2 p3                                                  | CGCAGCAACTCCTCACCG                                   | GAGAGTTTCCCTACCGCCG                                |
| CCNE2 p4                                                  | ACTCTACCGGGCCTTCTGC                                  | GAAAGACCTGGGTCCCTGAG                               |
| CCNE2 p5                                                  | CCTAGCTGTCCCGCCAAG                                   | GGAAAGCAGGGTTGATACATACC                            |
| CCNE2 p6                                                  | GGTATGTATCAACCCTGCTTTCC                              | CGTGGTGGCGATCTTTCTTC                               |
| CCNE2 p7                                                  | CGGGTGGGAAGAAAGATCG                                  | AAAACCTGTTTGCGGAATACC                              |
| CCNE2 p8                                                  | AACTGCACATCGTCAAGTCAGAC                              | AAGTGTGAAAAGGACTTCGCC                              |
| CCNE2 p9                                                  | GCGGGCGAAGTCCTTTTT                                   | CCTGACCCCTTTTCTTGACATC                             |
| CCNE2 p10                                                 | AAAGGTCTAACAGCATGATGTCAAG                            | GCATTCTGTTACATAATAGTCAAGG                          |

**Supplementary Table S1: Clinicopathological characteristics of studied patients and expression of E2F8 in breast cancer**

| Characteristics                           |        | Total | (%)   |
|-------------------------------------------|--------|-------|-------|
| Age (years)                               | < 48   | 91    | 48.7  |
|                                           | ≥ 48   | 96    | 51.3  |
| Gender                                    | Male   | 0     | 0.0   |
|                                           | Female | 187   | 100.0 |
| Clinical stage                            | I      | 33    | 17.6  |
|                                           | II     | 95    | 50.8  |
|                                           | III    | 51    | 27.3  |
|                                           | IV     | 8     | 4.3   |
| T classification                          | T1     | 55    | 29.4  |
|                                           | T2     | 103   | 55.1  |
|                                           | T3     | 18    | 9.6   |
|                                           | T4     | 11    | 5.9   |
| N classification                          | N0     | 84    | 44.9  |
|                                           | N1     | 54    | 28.9  |
|                                           | N2     | 32    | 17.1  |
| M classification                          | N3     | 17    | 9.1   |
|                                           | M0     | 180   | 96.3  |
|                                           | M1     | 7     | 3.7   |
| Estrogen Receptor (ER)                    | 0      | 87    | 46.5  |
|                                           | 1      | 35    | 18.7  |
|                                           | 2      | 18    | 9.6   |
|                                           | 3      | 46    | 24.6  |
|                                           | 4      | 1     | 0.5   |
| Progesterone Receptor (PR)                | 0      | 83    | 44.4  |
|                                           | 1      | 33    | 17.6  |
|                                           | 2      | 34    | 18.2  |
|                                           | 3      | 37    | 19.8  |
| Erb-b2 receptor tyrosine kinase 2 (ErbB2) | 0      | 92    | 49.2  |
|                                           | 1      | 27    | 14.4  |
|                                           | 2      | 22    | 11.8  |
|                                           | 3      | 46    | 24.6  |
| Ki67                                      | 0      | 34    | 18.2  |
|                                           | 1      | 69    | 36.9  |
|                                           | 2      | 52    | 27.8  |
| E2F8 expression                           | 3      | 32    | 17.1  |
|                                           | Low    | 95    | 50.8  |
|                                           | High   | 92    | 49.2  |
| Vital status                              | Alive  | 131   | 70.1  |
|                                           | Dead   | 56    | 29.9  |

**Supplementary Table S2: Correlation between the clinicopathological features and expression of E2F8**

| Characteristics  |       | E2F8                      |                            | $\chi^2$ test <i>p</i> value |
|------------------|-------|---------------------------|----------------------------|------------------------------|
|                  |       | Low expression<br>(50.8%) | High expression<br>(49.2%) |                              |
| Age (years)      | < 48  | 48                        | 43                         | 0.604                        |
|                  | ≥ 48  | 47                        | 49                         |                              |
| Clinical stage   | I     | 21                        | 12                         | 0.007                        |
|                  | II    | 54                        | 41                         |                              |
|                  | III   | 19                        | 32                         |                              |
|                  | IV    | 1                         | 7                          |                              |
| T classification | T1    | 33                        | 22                         | 0.031                        |
|                  | T2    | 54                        | 49                         |                              |
|                  | T3    | 6                         | 12                         |                              |
|                  | T4    | 2                         | 9                          |                              |
| N classification | N0    | 53                        | 31                         | 0.014                        |
|                  | N1    | 25                        | 29                         |                              |
|                  | N2    | 11                        | 21                         |                              |
| M classification | N3    | 6                         | 11                         | 0.049                        |
|                  | M0    | 94                        | 86                         |                              |
|                  | M1    | 1                         | 6                          |                              |
| ER               | 0     | 39                        | 48                         | 0.290                        |
|                  | 1     | 17                        | 18                         |                              |
|                  | 2     | 11                        | 7                          |                              |
|                  | 3     | 28                        | 18                         |                              |
| PR               | 4     | 0                         | 1                          | 0.921                        |
|                  | 0     | 42                        | 41                         |                              |
|                  | 1     | 16                        | 17                         |                              |
|                  | 2     | 19                        | 15                         |                              |
| ErbB2            | 3     | 18                        | 19                         | 0.926                        |
|                  | 0     | 49                        | 43                         |                              |
|                  | 1     | 13                        | 14                         |                              |
|                  | 2     | 11                        | 11                         |                              |
| Ki67             | 3     | 22                        | 24                         | 0.005                        |
|                  | 0     | 20                        | 14                         |                              |
|                  | 1     | 44                        | 25                         |                              |
| Vital status     | 2     | 17                        | 35                         | < 0.001                      |
|                  | 3     | 14                        | 18                         |                              |
|                  | Alive | 80                        | 51                         |                              |
|                  | Dead  | 15                        | 41                         |                              |

**Supplementary Table S3: Univariate and multivariate analysis of different prognostic parameters in patients with breast cancer by Cox-regression analysis**

|                       | Univariate analysis |                       | Multivariate analysis |                       |
|-----------------------|---------------------|-----------------------|-----------------------|-----------------------|
|                       | <i>P</i>            | Hazard ratio (95% CI) | <i>P</i>              | Hazard ratio (95% CI) |
| <b>Clinical stage</b> |                     |                       |                       |                       |
| I-II                  | < 0.001             | 2.864 (1.693–4.845)   | 0.001                 | 2.424 (1.416–4.150)   |
| III-IV                |                     |                       |                       |                       |
| <b>E2F8</b>           |                     |                       |                       |                       |
| Low expression        | < 0.001             | 3.619 (1.999–6.553)   | 0.001                 | 2.697 (1.463–4.974)   |
| High expression       |                     |                       |                       |                       |
| <b>Ki67</b>           |                     |                       |                       |                       |
| Low expression        | 0.006               | 2.137 (1.249–3.656)   | 0.022                 | 1.896 (1.099–3.271)   |
| High expression       |                     |                       |                       |                       |

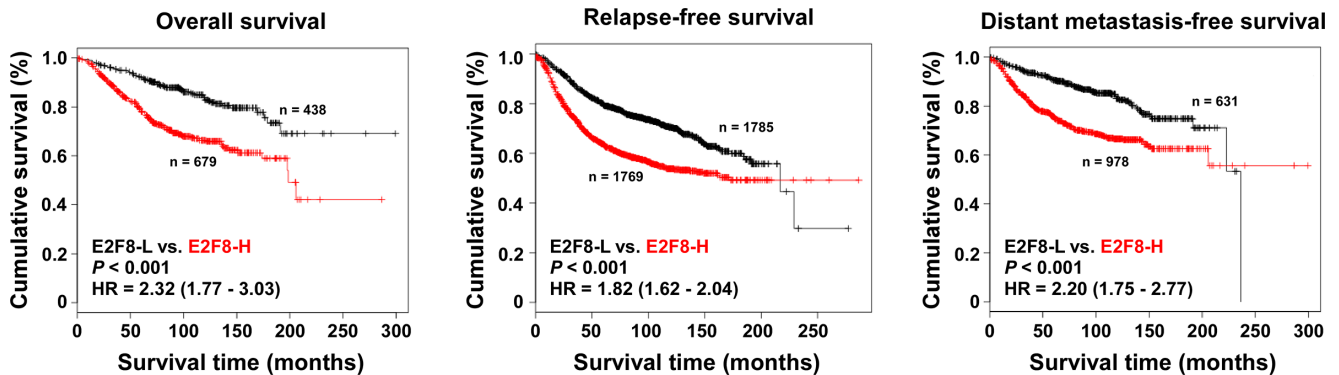

**Supplementary Figure S1: Kaplan-Meier survival curves from publicly available microarray data for breast cancer patients.** Overall survival, relapse-free survival and distant metastasis-free survival in breast cancer patients with high and low levels of E2F8 mRNA (auto selecting best cutoff) were analyzed using the publicly accessible tool KM Plotter (<http://kmplot.com/breast/>). The two cohorts of patients were compared by log-rank tests, and the hazard ratio with 95% confidence intervals was calculated.

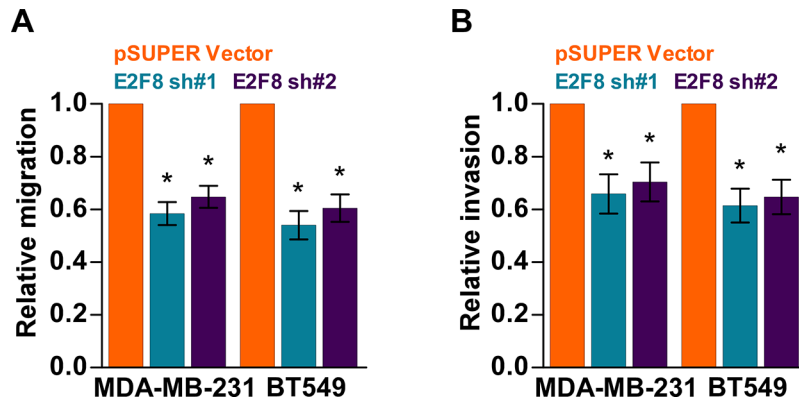

**Supplementary Figure S2: Effect of E2F8 overexpression and knockdown on cell migration and invasion.** (A) Transwell migration assays. The cells were transferred into transwell inserts without matrigel-coated membranes and assessed 24 hours after incubation. (B) Transwell invasion assays. The cells were transferred into transwell inserts containing matrigel-coated membranes and assessed 24 hours after incubation. Mean  $\pm$  SD in three independent experiments. Two sided *t* test. \**P* < .05.

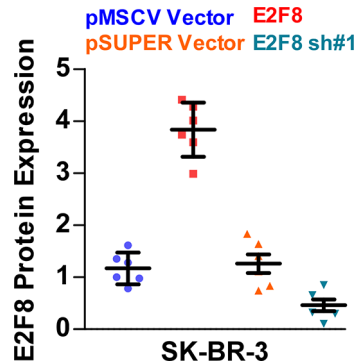

**Supplementary Figure S3: Expression of E2F8 in xenografts examined by western blot.** E2F8 was robustly upregulated in tumors formed by SK-BR-3/E2F8 cells, but downregulated in tumors formed by E2F8-silencing SK-BR-3 cells.

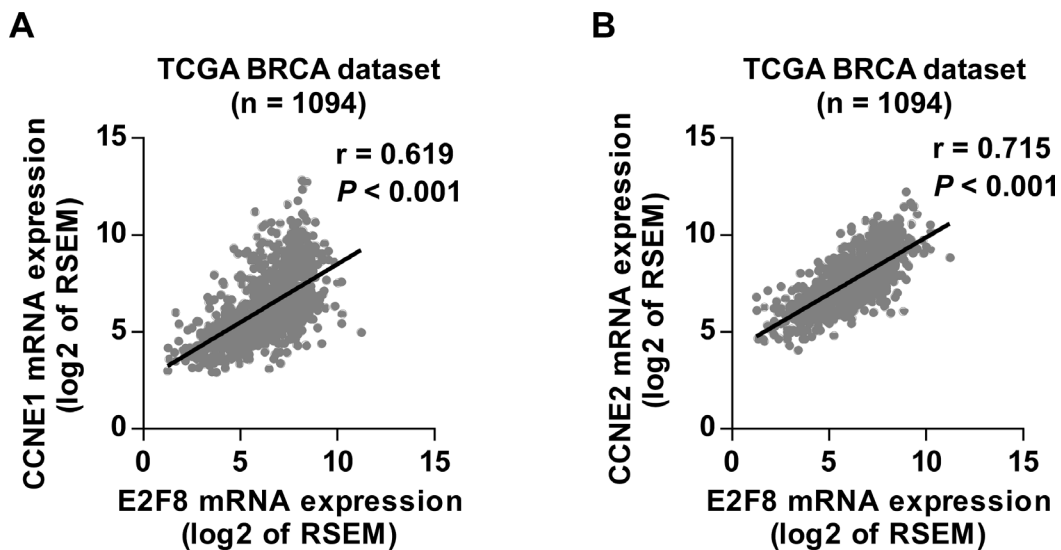

**Supplementary Figure S4: Expression of E2F8 positively correlating with CCNE1 and CCNE2.** Bivariate correlations between E2F8 and CCNE1(A)/CCNE2 (B) mRNA expression by Spearman's rank correlation coefficients from TCGA BRCA mRNA data set (*n* = 1094).

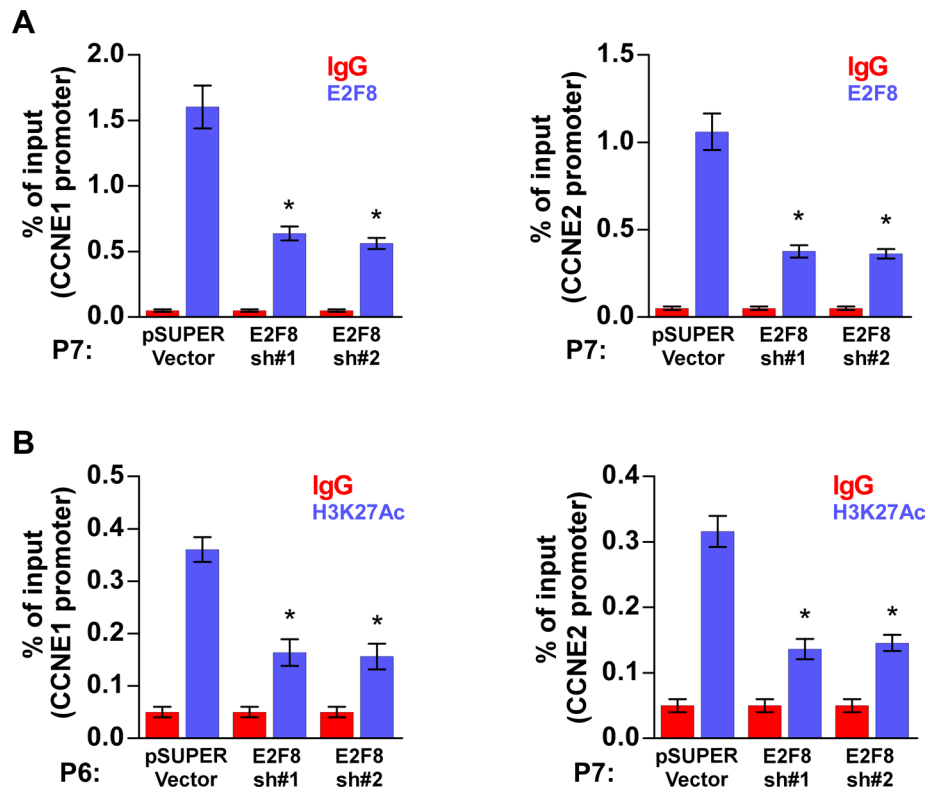

**Supplementary Figure S5: ChIP-validated E2F8 binding to CCNE1 and CCNE2 promoter.** (A) ChIP enrichment assay confirms that E2F8 binds to both the P7 ChIP primer PCR site of CCNE1 and CCNE2 in the E2F8-silencing cell. (B) The P6 ChIP primer PCR site of CCNE1 and the P7 ChIP primer PCR site of CCNE2 promoters enriched by pulling down transcription activation marker H3K27Ac or IgG. IgG was used as a negative control. Results were evaluated from three independent experiments,  $*P < 0.05$ .
